# Supplementary material for: Temperature sensing of Sr3Y2Ge3O12:Bi3+,Sm3+ garnet phosphors with tunable sensitivity
Source: Royal Society of Chemistry journal article supplement (doi:10.1039/d2dt03153a), 2023-01-01
Supplement: d2dt03153a1.pdf [file d2dt03153a1.pdf]

## Electronic Supporting Information

# Temperature Sensing of $\text{Sr}_3\text{Y}_2\text{Ge}_3\text{O}_{12}:\text{Bi}^{3+},\text{Sm}^{3+}$ Garnet Phosphors with Tunable Sensitivity

Rui Sun,<sup>a,b</sup> Xiang Wei,<sup>a</sup> Huijuan Yu,<sup>\*a</sup> Pengyun Chen,<sup>b</sup> Haiyong Ni,<sup>b</sup> Junhao Li,<sup>b</sup>  
Jiansheng Huo,<sup>b</sup> Jianbang Zhou<sup>\*b</sup> and Qihong Zhang<sup>\*b</sup>

<sup>a</sup> School of Chemical Engineering and Light Industry, Guangdong University of Technology, Guangzhou 510006, PR China

<sup>b</sup> Key Laboratory of Separation and Comprehensive Utilization of Rare Metals, Guangdong Province Key Laboratory of Rare Earth Development and Application, Institute of Resources Utilization and Rare Earth Development, Guangdong Academy of Sciences, Guangzhou 510651, PR China

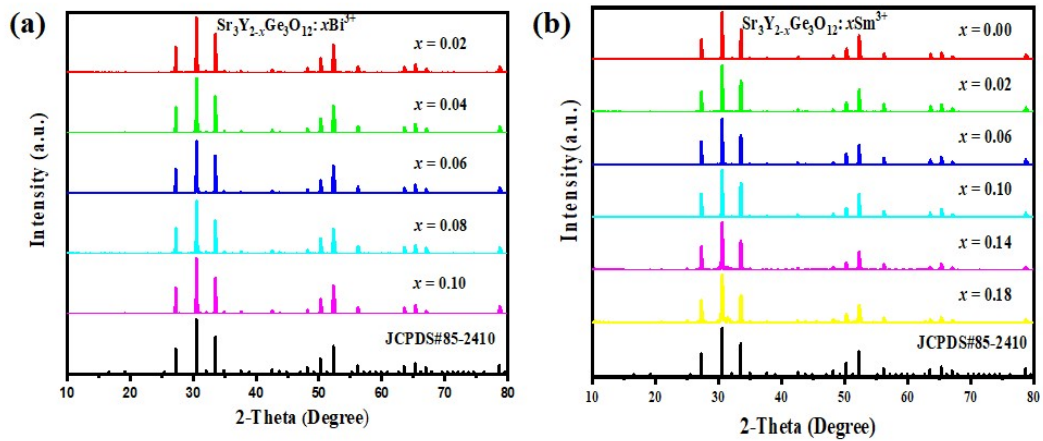

**Fig. S1** The XRD patterns of (a)  $\text{Sr}_3\text{Y}_2\text{Ge}_3\text{O}_{12}:y\text{Bi}^{3+}$  ( $y = 0.02 - 0.10$ ) and (b)  $\text{Sr}_3\text{Y}_2\text{Ge}_3\text{O}_{12}:x\text{Sm}^{3+}$  ( $x = 0.02 - 0.18$ ).

The XRD patterns of  $\text{Sr}_3\text{Y}_2\text{Ge}_3\text{O}_{12}:y\text{Bi}^{3+}$  ( $y = 0.02 - 0.10$ ) and  $\text{Sr}_3\text{Y}_2\text{Ge}_3\text{O}_{12}:x\text{Sm}^{3+}$  ( $x = 0.02 - 0.18$ ) are shown in **Fig. S1a** and **S1b**. It could be observed that the diffraction peaks  $\text{Sr}_3\text{Y}_2\text{Ge}_3\text{O}_{12}:y\text{Bi}^{3+}$  ( $y = 0.02 - 0.10$ ) matched well with the standard diffraction pattern of  $\text{Sr}_3\text{Y}_2\text{Ge}_3\text{O}_{12}$  (JCPDS 85-2410). When the doping  $\text{Sm}^{3+}$  concentration is  $x \geq 0.14$ , the impurity appears in the  $\text{Sr}_3\text{Y}_2\text{Ge}_3\text{O}_{12}:x\text{Sm}^{3+}$  ( $x = 0.02 - 0.18$ ) sample.

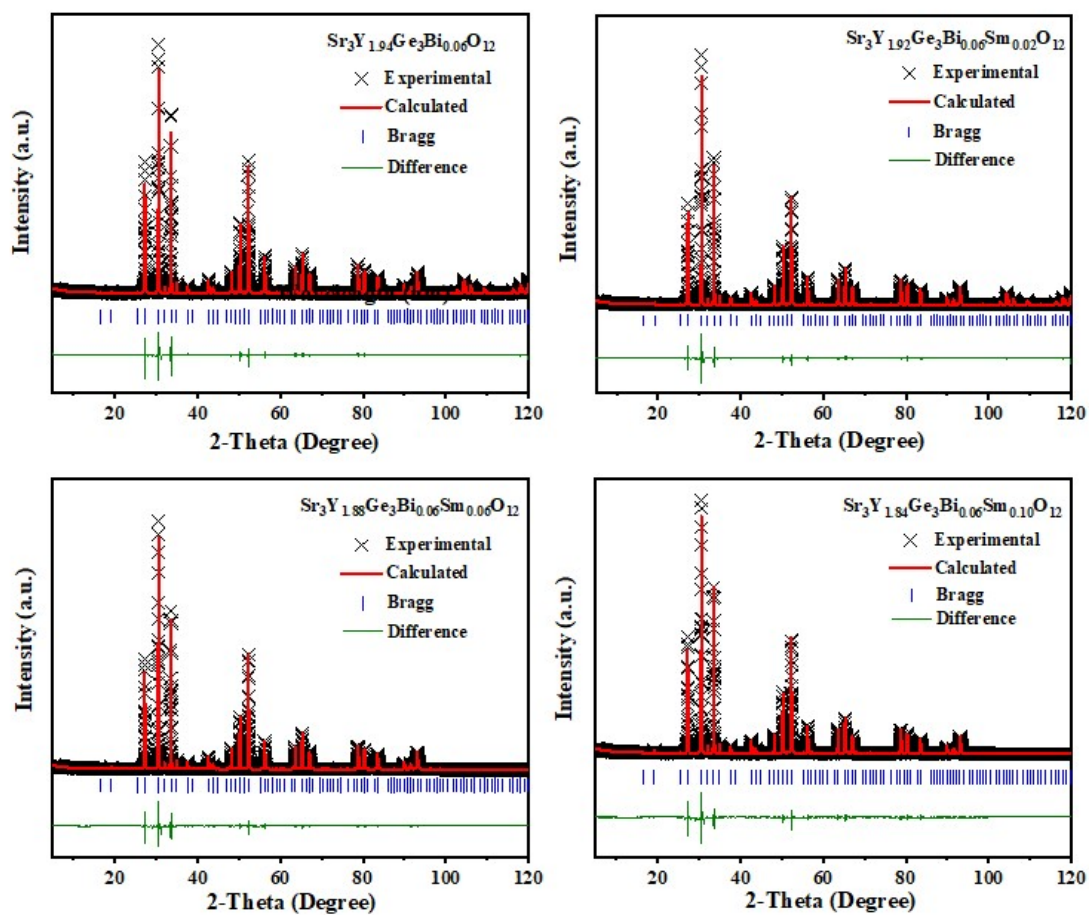

Fig. S2 XRD Rietveld refinement of  $\text{Sr}_3\text{Y}_2\text{Ge}_3\text{O}_{12}:0.06\text{Bi}^{3+},x\text{Sm}^{3+}$  ( $x = 0 - 0.10$ ).

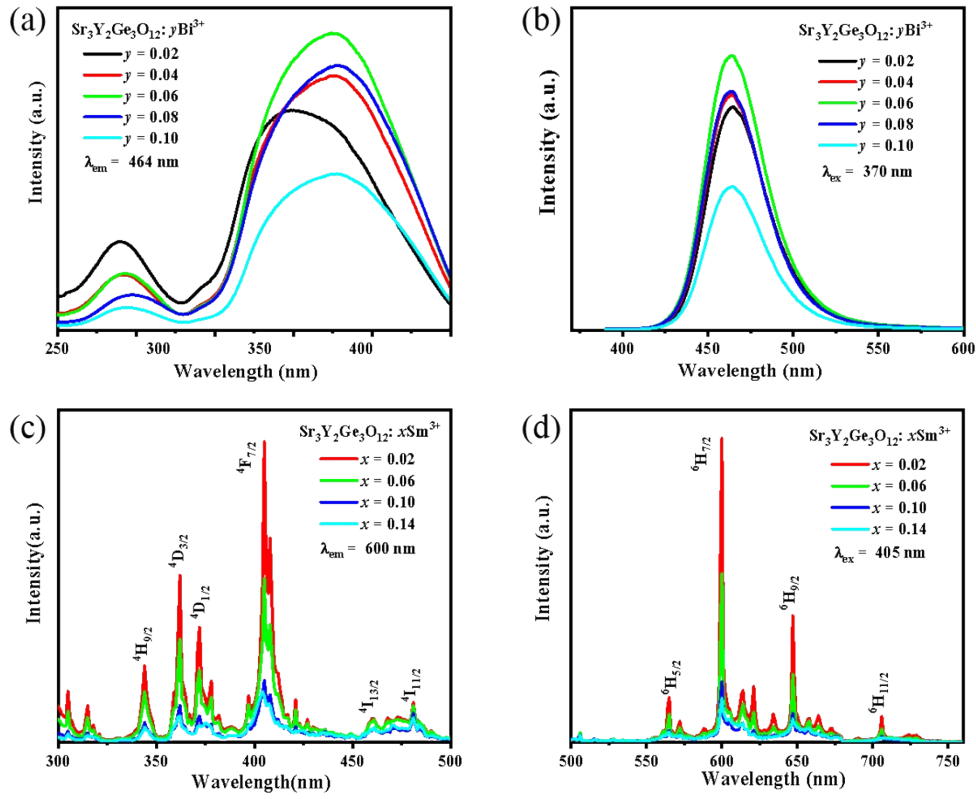

**Fig. S3** The PLE (a) and PL (b) spectrum of  $\text{Sr}_3\text{Y}_2\text{Ge}_3\text{O}_{12}:\text{yBi}^{3+}$  ( $y = 0.02 - 0.10$ ),  
The PLE (c) and PL (d) spectrum of  $\text{Sr}_3\text{Y}_2\text{Ge}_3\text{O}_{12}:\text{xSm}^{3+}$  ( $x = 0.02 - 0.14$ ).

The intensity of both the PLE and PL spectra of  $\text{Sr}_3\text{Y}_2\text{Ge}_3\text{O}_{12}:\text{yBi}^{3+}$  ( $y = 0.02 - 0.10$ ) increased firstly with increasing content and reached the maximum at  $y = 0.06$ , then decreased due to concentration quenching. Similarly, the  $\text{Sr}_3\text{Y}_2\text{Ge}_3\text{O}_{12}:\text{xSm}^{3+}$  ( $x = 0.02 - 0.14$ ) showed an optimal concentration at  $x = 0.02$ .

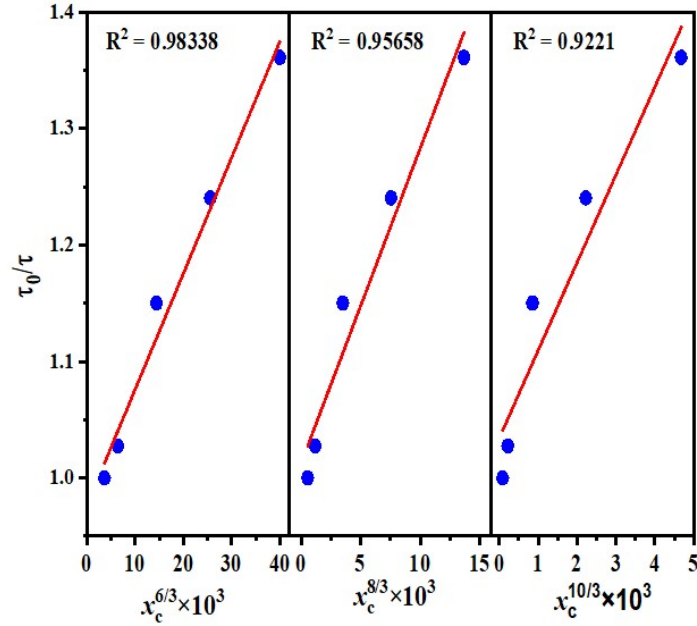

**Fig. S4** Dependence of  $\tau_0/\tau$  on  $C^{6/3}$ ,  $C^{8/3}$ , and  $C^{10/3}$ .

In general, the energy transfer between sensitizer and activator in the host may occur via two main mechanisms, namely exchange interaction and electric multipolar interaction. To verify which of these mechanisms plays an important role, the critical distance  $R_c$  between  $\text{Bi}^{3+}$  and  $\text{Sm}^{3+}$  in  $\text{Sr}_3\text{Y}_2\text{Ge}_3\text{O}_{12}$  was estimated using the following equation:

$$R_c = 2 \times \left[ \frac{3V}{4\pi\chi_c N} \right]^{1/3}$$

where  $V$  corresponds to the volume of the unit cell,  $N$  is the number of host cations in the unit cell, and  $X_c$  is the critical total concentration of  $\text{Bi}^{3+}$  and  $\text{Sm}^{3+}$ . For  $\text{Sr}_3\text{Y}_2\text{Ge}_3\text{O}_{12}:0.06\text{Bi}^{3+}, 0.018\text{Sm}^{3+}$  phosphor,  $N = 8$ ,  $V = 2241.46 \text{ \AA}^3$ ,  $\chi = 0.06 + 0.018 = 0.078$ , the  $R_c$  between  $\text{Bi}^{3+}$  and  $\text{Sm}^{3+}$  was calculated to be  $19.00 \text{ \AA}$ . Thus, in the case of the maximum doping concentration, it still exceeds a distance of 8, excluding the possibility of exchange interactions. The energy transfer from  $\text{Bi}^{3+}$  to  $\text{Sm}^{3+}$  mainly resulted from multipolar interactions.

To further investigate the specific energy transfer mechanism between the sensitizer  $\text{Bi}^{3+}$  and the activator  $\text{Sm}^{3+}$  in  $\text{Sr}_3\text{Y}_2\text{Ge}_3\text{O}_{12}$ , we used Dexter energy transfer theory for a deeper elaboration. Dexter energy transfer theory and Reisfeld's approximation are expressed as follows:

$$\frac{\tau_0}{\tau} \propto C^{n/3}$$

where  $C$  is the sum of  $\text{Bi}^{3+}$  and  $\text{Sm}^{3+}$  concentration in the sample; and  $n$  is a constant. Different values of  $n$  values indicate different interaction models, which correspond to dipole-dipole (d-d) interaction, dipole-quadrupole (d-q) interaction and quadrupole-quadrupole (q-q) interaction when  $n = 6, 8$  and  $10$ , respectively. The linear fit between  $\tau_0/\tau$  and the total concentration  $C$  for different values of  $n$  are depicted in **Fig. S4**. It was clearly that the best linear fit was achieved when  $n = 6$ , which indicated that the energy transfer mechanism between  $\text{Bi}^{3+}$  and  $\text{Sm}^{3+}$  was mainly dipole-dipole interaction.

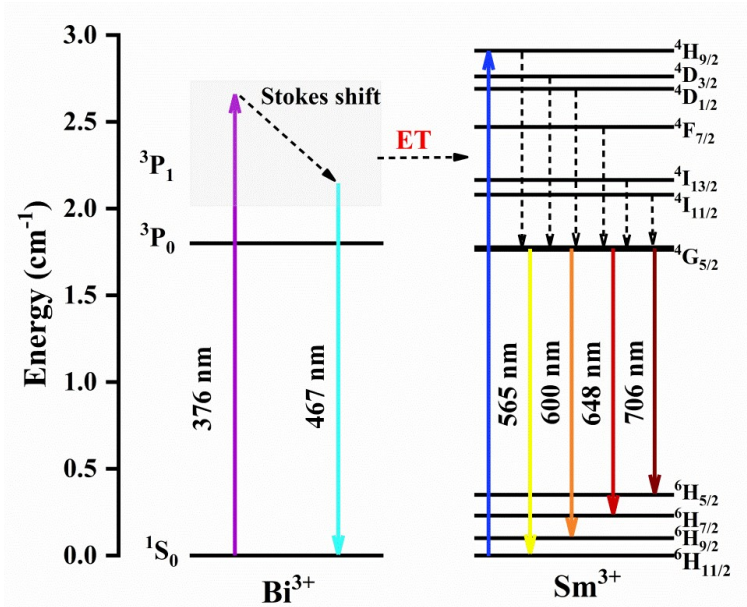

**Fig. S5** The energy level diagrams of  $\text{Bi}^{3+}$  and  $\text{Sm}^{3+}$  ions in  $\text{Sr}_3\text{Y}_2\text{Ge}_3\text{O}_{12}$ .

The energy level diagrams of  $\text{Bi}^{3+}$  and  $\text{Sm}^{3+}$  ions in  $\text{Sr}_3\text{Y}_2\text{Ge}_3\text{O}_{12}$  are present in **Fig. S5** to explain the energy transfer process in detail. The free electrons of the  $\text{Bi}^{3+}$  ions can absorb UV light and jump from the  $^1\text{S}_0$  ground state to the  $^3\text{P}_1$  excited state. On the one hand, part of the excited electrons falls back to the ground  $^1\text{S}_0$  state and gives out a broad blue emission band of in the range of 420 – 540 nm. On the other hand, some of the excited electrons migrate to neighboring  $\text{Sm}^{3+}$  ions, and then relax radiatively from  $^4\text{G}_{5/2}$  excited state to the lower  $^6\text{H}_{11/2}$ ,  $^6\text{H}_{9/2}$ ,  $^6\text{H}_{7/2}$  and  $^6\text{H}_{5/2}$  states, producing the typical emission at 565, 600, 648 and 706 nm, respectively. Meanwhile,

the free electrons of  $\text{Sm}^{3+}$  can also absorb UV light and jump to the excited state, and then gives its characteristic f-f emissions as mentioned above.

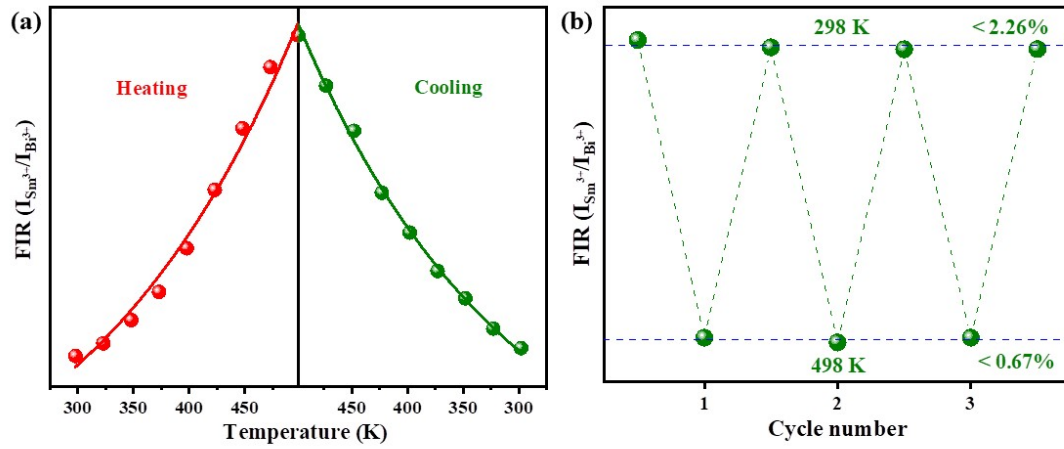

**Fig. S6** (a) Temperature-dependent FIR ( $I_{\text{Sm}^{3+}}/I_{\text{Bi}^{3+}}$ ) of  $\text{Sr}_3\text{Y}_2\text{Ge}_3\text{O}_{12}:0.06\text{Bi}^{3+},0.02\text{Sm}^{3+}$  phosphor upon the cycling process of heating and cooling in the temperature range from 298 to 498 K. (b)

Temperature cycling of FIR in the temperature 298-498 K.

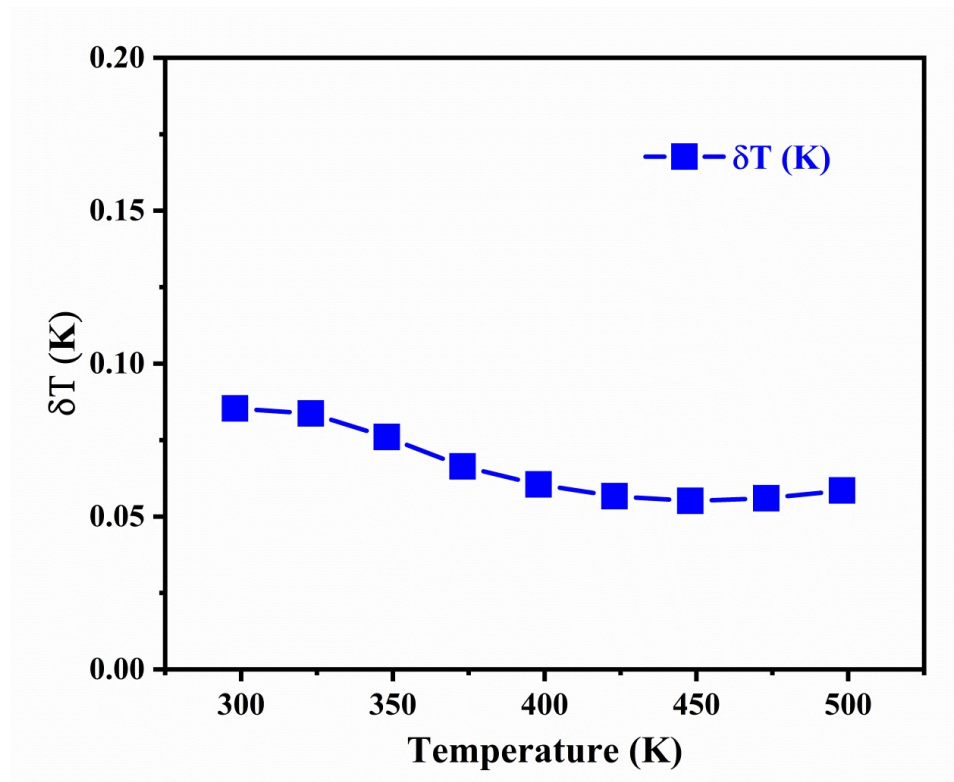

**Fig. S7** The temperature resolution of  $\text{Sr}_3\text{Y}_2\text{Ge}_3\text{O}_{12}:0.06\text{Bi}^{3+},0.02\text{Sm}^{3+}$  phosphor in the range of

298-498 K.

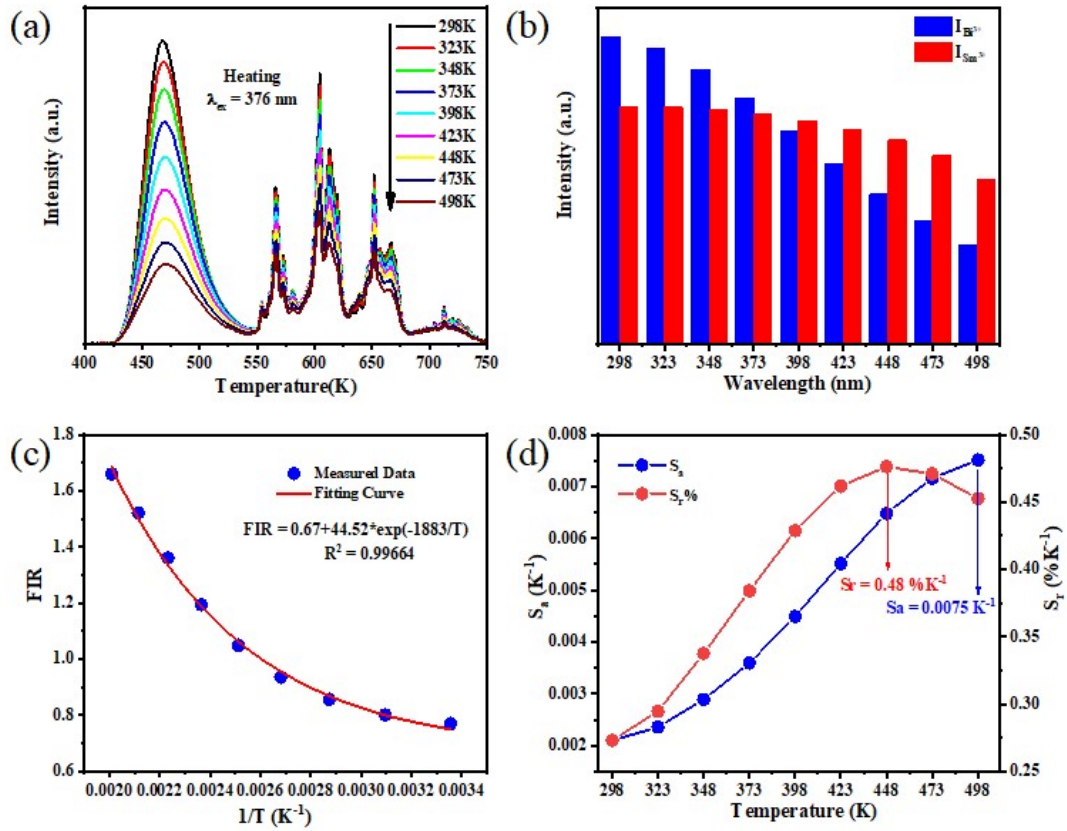

**Fig. S8** (a) Emission spectra of  $\text{Sr}_3\text{Y}_2\text{Ge}_3\text{O}_{12}:0.06\text{Bi}^{3+},0.06\text{Sm}^{3+}$  from 298 to 498 K, (b) The integrated PL intensity of  $\text{Bi}^{3+}$  and  $\text{Sm}^{3+}$  from 298 K to 498 K, (c) Measured and fitted FIR data of  $\text{Sr}_3\text{Y}_2\text{Ge}_3\text{O}_{12}:0.06\text{Bi}^{3+},0.06\text{Sm}^{3+}$ , (d) Dependence of  $S_a$  and  $S_r$  on T.



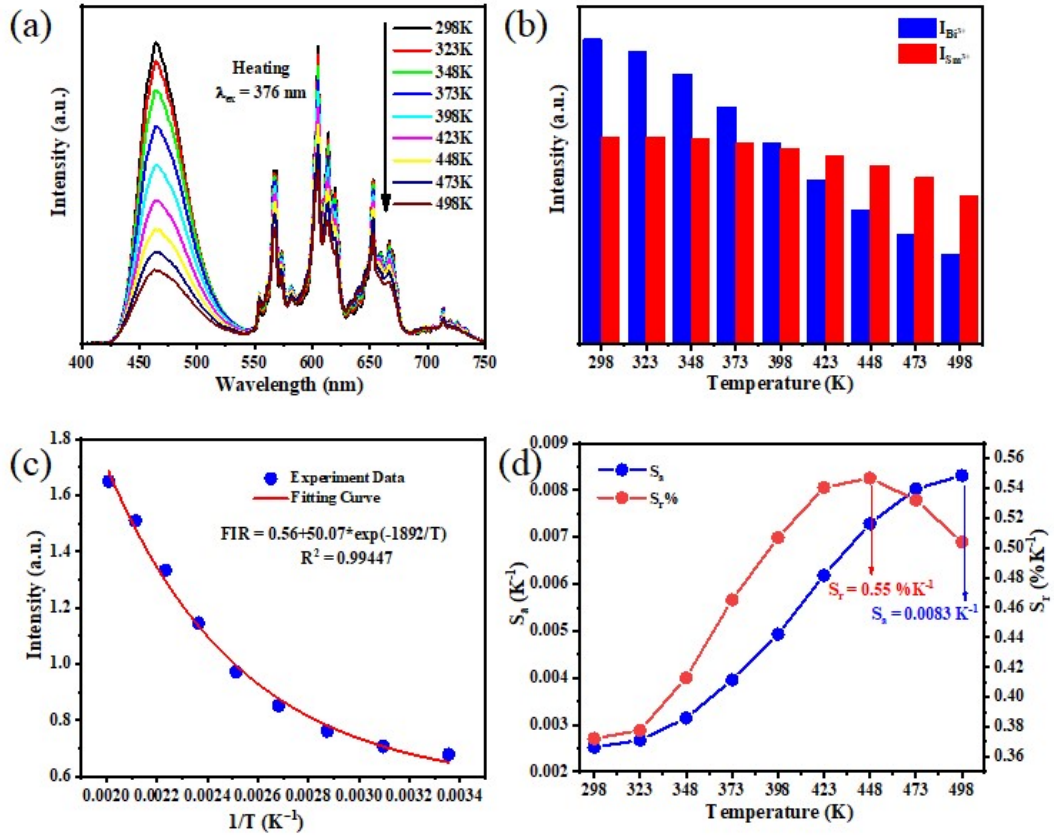

**Fig. S9** (a) Emission spectra of  $\text{Sr}_3\text{Y}_2\text{Ge}_3\text{O}_{12}:\text{0.06Bi}^{3+},\text{0.10Sm}^{3+}$  from 298 to 498 K, (b) The integrated PL intensity of  $\text{Bi}^{3+}$  and  $\text{Sm}^{3+}$  from 298 K to 498 K, (c) Measured and fitted FIR data of  $\text{Sr}_3\text{Y}_2\text{Ge}_3\text{O}_{12}:\text{0.06Bi}^{3+},\text{0.10Sm}^{3+}$ , (d) Dependence of  $S_a$  and  $S_r$  on T.

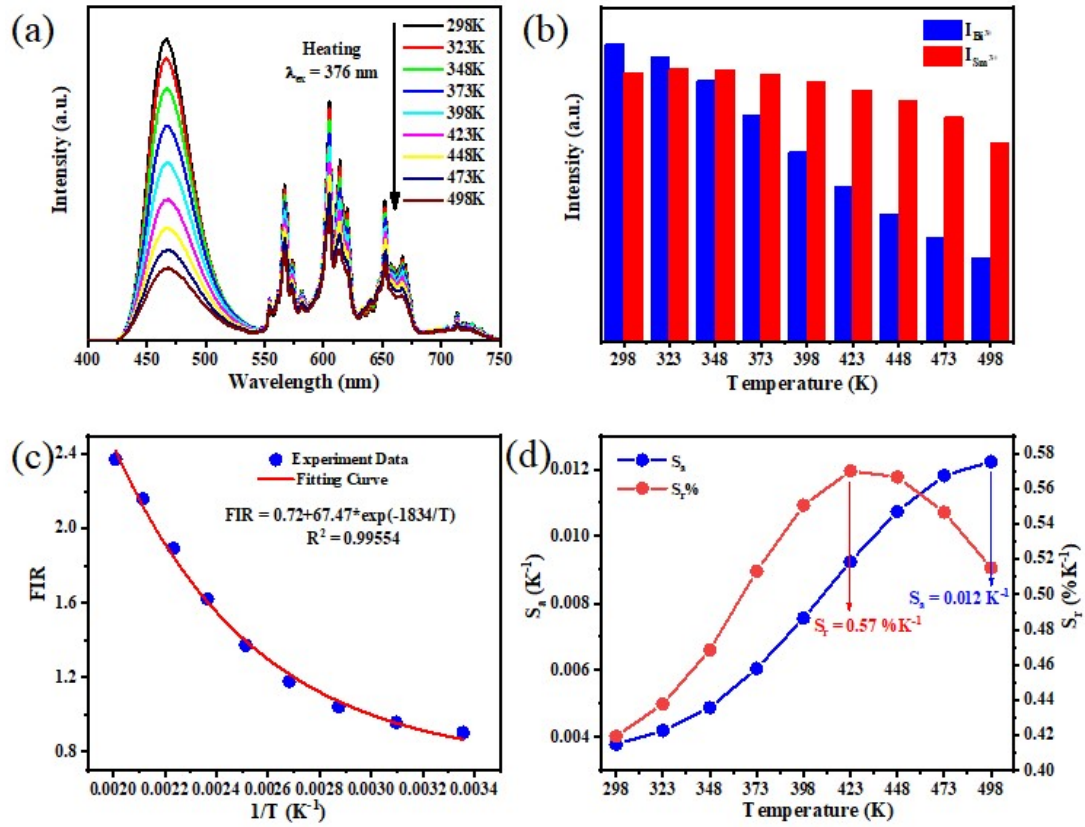

**Fig. S10** (a) Emission spectra of  $\text{Sr}_3\text{Y}_2\text{Ge}_3\text{O}_{12}:0.06\text{Bi}^{3+},0.14\text{Sm}^{3+}$  from 298 to 498 K, (b) The integrated PL intensity of  $\text{Bi}^{3+}$  and  $\text{Sm}^{3+}$  from 298 K to 498 K, (c) Measured and fitted FIR data of  $\text{Sr}_3\text{Y}_2\text{Ge}_3\text{O}_{12}:0.06\text{Bi}^{3+},0.14\text{Sm}^{3+}$ , (d) Dependence of  $S_a$  and  $S_r$  on T.

**Table S1** Rietveld refinement and crystallographic data of Sr<sub>3</sub>Y<sub>1.94</sub>Bi<sub>0.06</sub>Ge<sub>3</sub>O<sub>12</sub>.

| Formula                           | Sr <sub>3</sub> Y <sub>1.94</sub> Bi <sub>0.06</sub> Ge <sub>3</sub> O <sub>12</sub> |       |       |       |           |                  |
|-----------------------------------|--------------------------------------------------------------------------------------|-------|-------|-------|-----------|------------------|
| Crystal system                    | Cubic                                                                                |       |       |       |           |                  |
| Space group                       | $Ia\bar{3}d$ (230, O <sub>h</sub> <sup>10</sup> )                                    |       |       |       |           |                  |
| Cell Parameters                   | $a = 13.08235 \text{ \AA}$                                                           |       |       |       |           |                  |
| Cell Parameters Volume            | $V = 2239.016 \text{ \AA}^3$                                                         |       |       |       |           |                  |
| Reliability factors               | $R_{wp} = 15.83\%$ , $R_p = 11.08\%$ and $GOF = 2.99$                                |       |       |       |           |                  |
| Atom                              | Site                                                                                 | x     | y     | z     | Occupancy | U <sub>iso</sub> |
| Sr <sup>2+</sup>                  | 24c                                                                                  | 0.125 | 0.00  | 0.25  | 1         | 0.024            |
| Y <sup>3+</sup> /Bi <sup>3+</sup> | 16a                                                                                  | 0.00  | 0.00  | 0.00  | 1         | 0.022            |
| Ge <sup>4+</sup>                  | 24d                                                                                  | 0.375 | 0     | 0.25  | 1         | 0.021            |
| O <sup>2-</sup>                   | 96h                                                                                  | 0.965 | 0.054 | 0.160 | 1         | 0.029            |

**Table S2** Rietveld refinement and crystallographic data of Sr<sub>3</sub>Y<sub>1.92</sub>Bi<sub>0.06</sub>Sm<sub>0.02</sub>Ge<sub>3</sub>O<sub>12</sub>.

| Formula                                             | Sr <sub>3</sub> Y <sub>1.92</sub> Bi <sub>0.06</sub> Sm <sub>0.02</sub> Ge <sub>3</sub> O <sub>12</sub> |       |       |       |           |                  |
|-----------------------------------------------------|---------------------------------------------------------------------------------------------------------|-------|-------|-------|-----------|------------------|
| Crystal system                                      | Cubic                                                                                                   |       |       |       |           |                  |
| Space group                                         | $Ia\bar{3}d$ (230, O <sub>h</sub> <sup>10</sup> )                                                       |       |       |       |           |                  |
| Cell Parameters                                     | $a = 13.08323 \text{ \AA}$                                                                              |       |       |       |           |                  |
| Cell Parameters Volume                              | $V = 2239.468 \text{ \AA}^3$                                                                            |       |       |       |           |                  |
| Reliability factors                                 | $R_{wp} = 15.42\%$ , $R_p = 10.11\%$ and $GOF = 2.83$                                                   |       |       |       |           |                  |
| Atom                                                | Site                                                                                                    | x     | y     | z     | Occupancy | U <sub>iso</sub> |
| Sr <sup>2+</sup>                                    | 24c                                                                                                     | 0.125 | 0.00  | 0.25  | 1         | 0.025            |
| Y <sup>3+</sup> /Bi <sup>3+</sup> /Sm <sup>3+</sup> | 16a                                                                                                     | 0.00  | 0.00  | 0.00  | 1         | 0.025            |
| Ge <sup>4+</sup>                                    | 24d                                                                                                     | 0.375 | 0     | 0.25  | 1         | 0.021            |
| O <sup>2-</sup>                                     | 96h                                                                                                     | 0.959 | 0.051 | 0.158 | 1         | 0.027            |

**Table S3** Rietveld refinement and crystallographic data of Sr<sub>3</sub>Y<sub>1.88</sub>Bi<sub>0.06</sub>Sm<sub>0.06</sub>Ge<sub>3</sub>O<sub>12</sub>.

| Formula                                             | Sr <sub>3</sub> Y <sub>1.88</sub> Bi <sub>0.06</sub> Sm <sub>0.06</sub> Ge <sub>3</sub> O <sub>12</sub> |       |       |       |           |                  |
|-----------------------------------------------------|---------------------------------------------------------------------------------------------------------|-------|-------|-------|-----------|------------------|
| Crystal system                                      | Cubic                                                                                                   |       |       |       |           |                  |
| Space group                                         | $Ia\bar{3}d$ (230, O <sub>h</sub> <sup>10</sup> )                                                       |       |       |       |           |                  |
| Cell Parameters                                     | $a = 13.08423 \text{ \AA}$                                                                              |       |       |       |           |                  |
| Cell Parameters Volume                              | $V = 2239.982 \text{ \AA}^3$                                                                            |       |       |       |           |                  |
| Reliability factors                                 | $R_{wp} = 15.26\%$ , $R_p = 9.52\%$ and $GOF = 2.80$                                                    |       |       |       |           |                  |
| Atom                                                | Site                                                                                                    | x     | y     | z     | Occupancy | U <sub>iso</sub> |
| Sr <sup>2+</sup>                                    | 24c                                                                                                     | 0.125 | 0.00  | 0.25  | 1         | 0.027            |
| Y <sup>3+</sup> /Bi <sup>3+</sup> /Sm <sup>3+</sup> | 16a                                                                                                     | 0.00  | 0.00  | 0.00  | 1         | 0.025            |
| Ge <sup>4+</sup>                                    | 24d                                                                                                     | 0.375 | 0     | 0.25  | 1         | 0.025            |
| O <sup>2-</sup>                                     | 96h                                                                                                     | 0.959 | 0.051 | 0.159 | 1         | 0.029            |

**Table S4** Rietveld refinement and crystallographic data of Sr<sub>3</sub>Y<sub>1.84</sub>Bi<sub>0.06</sub>Sm<sub>0.10</sub>Ge<sub>3</sub>O<sub>12</sub>.

| Formula                                             | Sr <sub>3</sub> Y <sub>1.84</sub> Bi <sub>0.06</sub> Sm <sub>0.10</sub> Ge <sub>3</sub> O <sub>12</sub> |       |       |       |           |                  |
|-----------------------------------------------------|---------------------------------------------------------------------------------------------------------|-------|-------|-------|-----------|------------------|
| Crystal system                                      | Cubic                                                                                                   |       |       |       |           |                  |
| Space group                                         | $Ia\bar{3}d$ (230, O <sub>h</sub> <sup>10</sup> )                                                       |       |       |       |           |                  |
| Cell Parameters                                     | $a = 13.0875 \text{ \AA}$                                                                               |       |       |       |           |                  |
| Cell Parameters Volume                              | $V = 2241.662 \text{ \AA}^3$                                                                            |       |       |       |           |                  |
| Reliability factors                                 | $R_{wp} = 14.26\%$ , $R_p = 9.28\%$ and $GOF = 2.60$                                                    |       |       |       |           |                  |
| Atom                                                | Site                                                                                                    | x     | y     | z     | Occupancy | U <sub>iso</sub> |
| Sr <sup>2+</sup>                                    | 24c                                                                                                     | 0.125 | 0.00  | 0.25  | 1         | 0.030            |
| Y <sup>3+</sup> /Bi <sup>3+</sup> /Sm <sup>3+</sup> | 16a                                                                                                     | 0.00  | 0.00  | 0.00  | 1         | 0.027            |
| Ge <sup>4+</sup>                                    | 24d                                                                                                     | 0.375 | 0     | 0.25  | 1         | 0.028            |
| O <sup>2-</sup>                                     | 96h                                                                                                     | 0.960 | 0.054 | 0.158 | 1         | 0.033            |

**Table S5** Rietveld refinement and crystallographic data of  $\text{Sr}_3\text{Y}_{1.8}\text{Bi}_{0.06}\text{Sm}_{0.14}\text{Ge}_3\text{O}_{12}$ .

| Formula                                       | $\text{Sr}_3\text{Y}_{1.8}\text{Bi}_{0.06}\text{Sm}_{0.14}\text{Ge}_3\text{O}_{12}$ |       |       |       |           |                  |
|-----------------------------------------------|-------------------------------------------------------------------------------------|-------|-------|-------|-----------|------------------|
| Crystal system                                | Cubic                                                                               |       |       |       |           |                  |
| Space group                                   | $Ia\bar{3}d$ (230, $O_h^{10}$ )                                                     |       |       |       |           |                  |
| Cell Parameters                               | $a = 13.08755 \text{ \AA}$                                                          |       |       |       |           |                  |
| Cell Parameters Volume                        | $V = 2241.687 \text{ \AA}^3$                                                        |       |       |       |           |                  |
| Reliability factors                           | $R_{\text{wp}} = 11.55\%$ , $R_p = 7.58\%$ and $\text{GOF} = 2.11$                  |       |       |       |           |                  |
| Atom                                          | Site                                                                                | x     | y     | z     | Occupancy | $U_{\text{iso}}$ |
| $\text{Sr}^{2+}$                              | 24c                                                                                 | 0.125 | 0.00  | 0.25  | 1         | 0.034            |
| $\text{Y}^{3+}/\text{Bi}^{3+}/\text{Sm}^{3+}$ | 16a                                                                                 | 0.00  | 0.00  | 0.00  | 1         | 0.030            |
| $\text{Ge}^{4+}$                              | 24d                                                                                 | 0.375 | 0     | 0.25  | 1         | 0.031            |
| $\text{O}^{2-}$                               | 96h                                                                                 | 0.958 | 0.051 | 0.158 | 1         | 0.041            |

**Table S6** Relative sensitivities ( $S_r$ ) of some garnet FIR type thermometers.

| Compounds                                                                        | Temperature (K) | $S_r$ (%K <sup>-1</sup> ) | Ref.      |
|----------------------------------------------------------------------------------|-----------------|---------------------------|-----------|
| $\text{Sr}_3\text{Y}_2\text{Ge}_3\text{O}_{12}:\text{Bi}^{3+}, \text{Sm}^{3+}$   | 298-498 K       | 0.61                      | This work |
| YAG: $\text{Nd}^{3+}$                                                            | 283-342 K       | 0.15                      | [21]      |
| GGG: $\text{Yb}, \text{Er}$                                                      | 300-973 K       | 0.41                      | [22]      |
| $\text{Ca}_2\text{YZr}_2\text{Al}_3\text{O}_{12}:\text{Bi}^{3+}, \text{Eu}^{3+}$ | 250-575 K       | 0.664                     | [23]      |
| $\text{Li}_3\text{Gd}_3\text{Te}_2\text{O}_{12}:\text{Bi}^{3+}, \text{Pr}^{3+}$  | 100-300 K       | 0.672                     | [24]      |
| LuAG: $\text{Eu}^{3+}/\text{Mn}^{4+}$                                            | 303-358 K       | 0.7                       | [25]      |
| $\text{Mg}_3\text{Y}_2\text{Ge}_3\text{O}_{12}:\text{Ce}^{3+}, \text{Cr}^{3+}$   | 298-573 K       | 1.38                      | [26]      |
| $\text{Sr}_2\text{NaMg}_2\text{V}_3\text{O}_{12}:\text{Eu}^{3+}$                 | 300-500 K       | 1.61                      | [27]      |
| LuAG: $\text{Ce}^{3+}, \text{Mn}^{4+}$                                           | 100-350 K       | 4.37                      | [28]      |
